# Supplementary material
Source: Preprints.org preprint supplement (doi:10.20944/preprints201908.0224.v1)
Supplement: Supplementary file 2 [file Supplementary Table S1.docx]

**Supplementary Table S1.** The potential accelerometer indicators as a basis for the cluster identification.

| **Intensity Category** | **MET** | **Cut points** | **M (SD)** |
| --- | --- | --- | --- |
| Sedentary behaviour | < 1.5 | 0 - 99 | 559.38 (92.86) |
| Very light PA behaviour | 1.5 - 2.0 | 100 – 928 | 149.93 (50.20) |
| Light PA behavior | 2.0 - 3.0 | 929 – 1951 | 49.12 (24.76) |
| Moderate PA behaviour | 3.0 - 6.0 | 1952 – 5724 | 28.77 (22.33) |
| Vigorous PA behaviour* | 6.0 - 9.0 | 5725 – 9498 | 0.39 (1.60) |
| Very vigorous PA behaviour* | > 9.0 | > 9499 | 0.02 (0.22) |

Note: *not used as cluster formation variable
