# Supplementary material
Source: Preprints.org preprint supplement (doi:10.20944/preprints201908.0224.v1)

**Supplementary Figure S2.** Scree plot for the identification of the number of clusters.


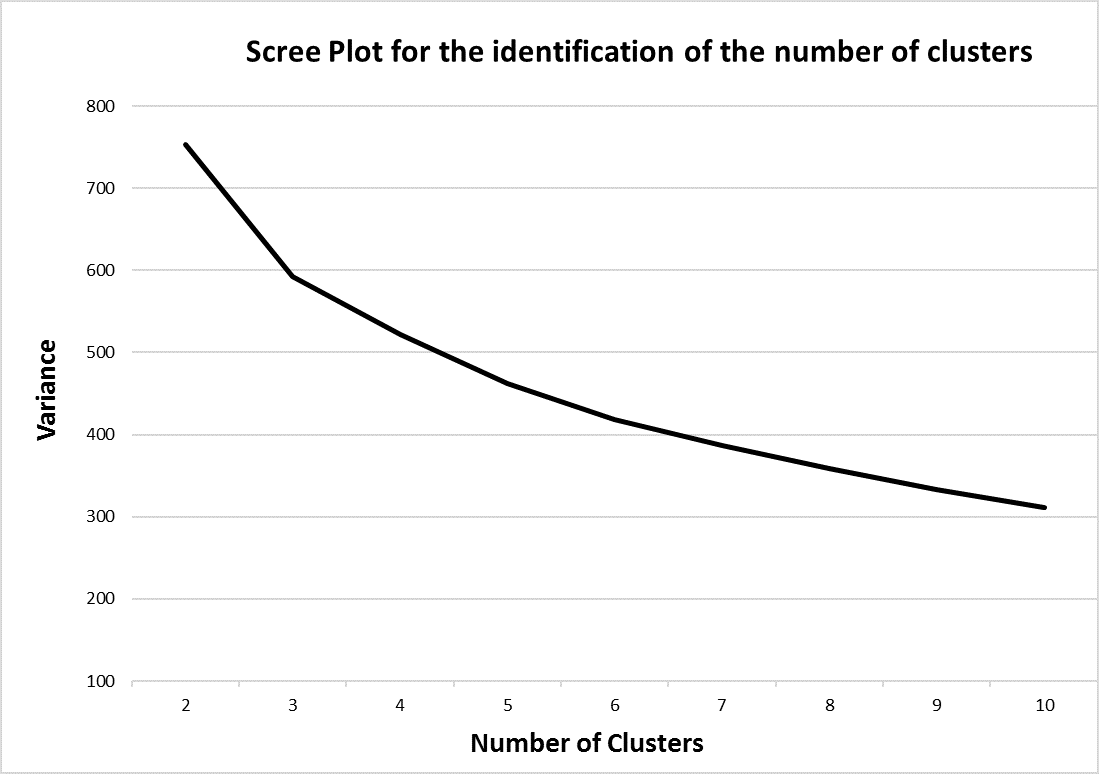

Supplement: Supplementary file 1 [file Supplementary Figure S2.docx]
